# Supplementary material for: United atom and coarse grained models for crosslinked polydimethylsiloxane with applications to the rheology of silicone fluids
Source: Royal Society of Chemistry journal article supplement (doi:10.1039/d2cp04920a), 2023-01-01
Supplement: d2cp04920a1.pdf [file d2cp04920a1.pdf]

Electronic Supplementary Material

**United atom and coarse grained models for crosslinked polydimethylsiloxane  
with applications to the rheology of silicone fluids**

Aditi Khot, Rebecca K. Lindsey, James P. Lewicki, Amitesh Maiti,  
Nir Goldman, and Matthew P. Kroonblawd

## Section S1: Potential Energy Functions for Covalent Terms in Coarse Grain Model

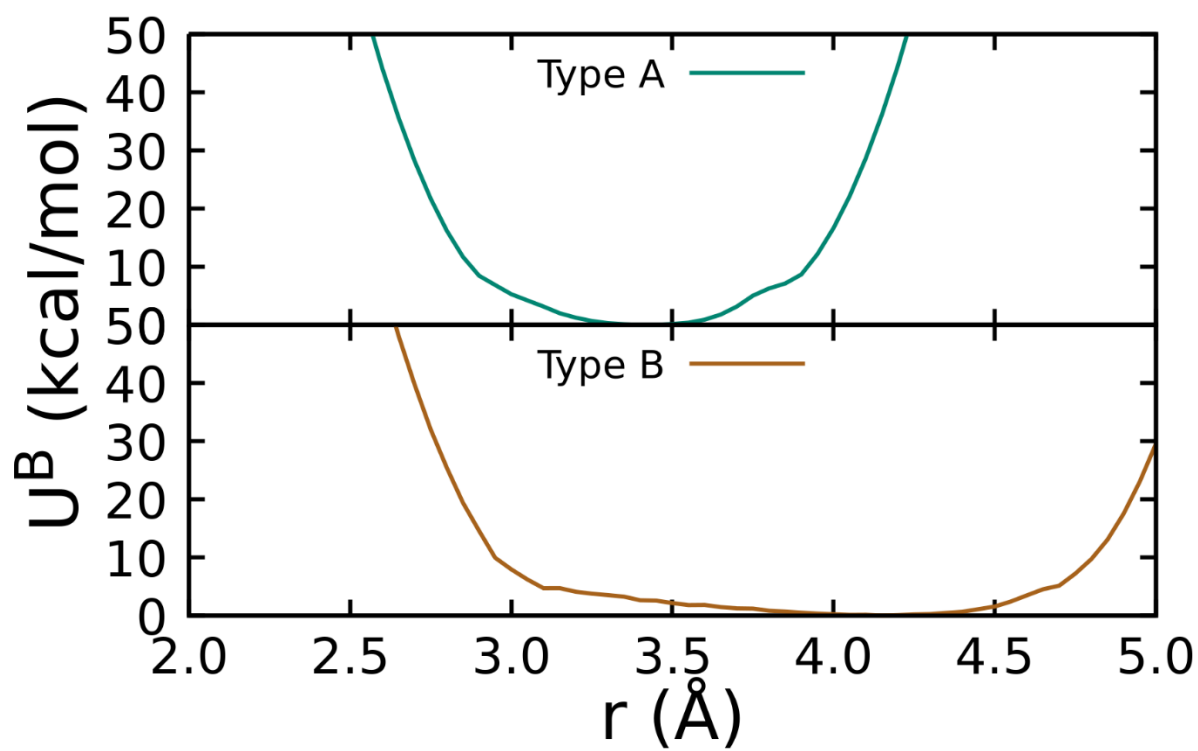

**Figure S1.** Potential energy functions for bonds in the coarse grain model. See Table 3 in the main text for type definitions.

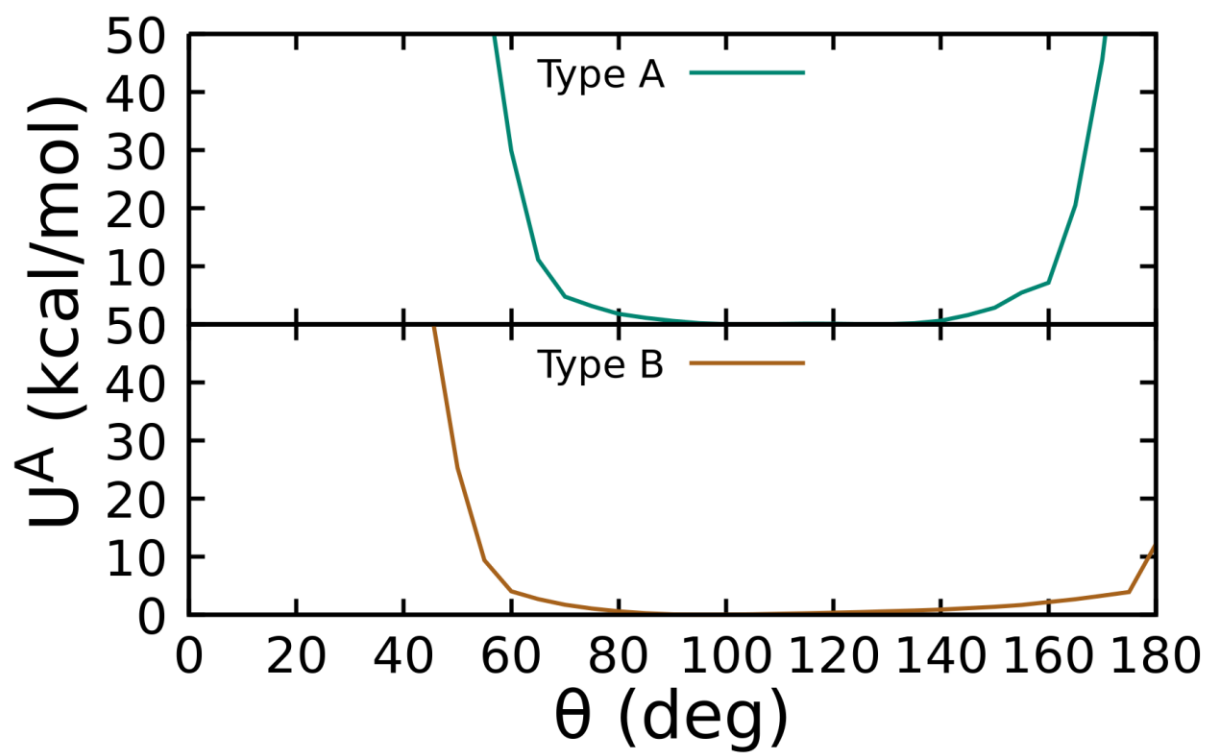

**Figure S2.** Potential energy functions for angles in the coarse grain model. See Table 3 in the main text for type definitions.

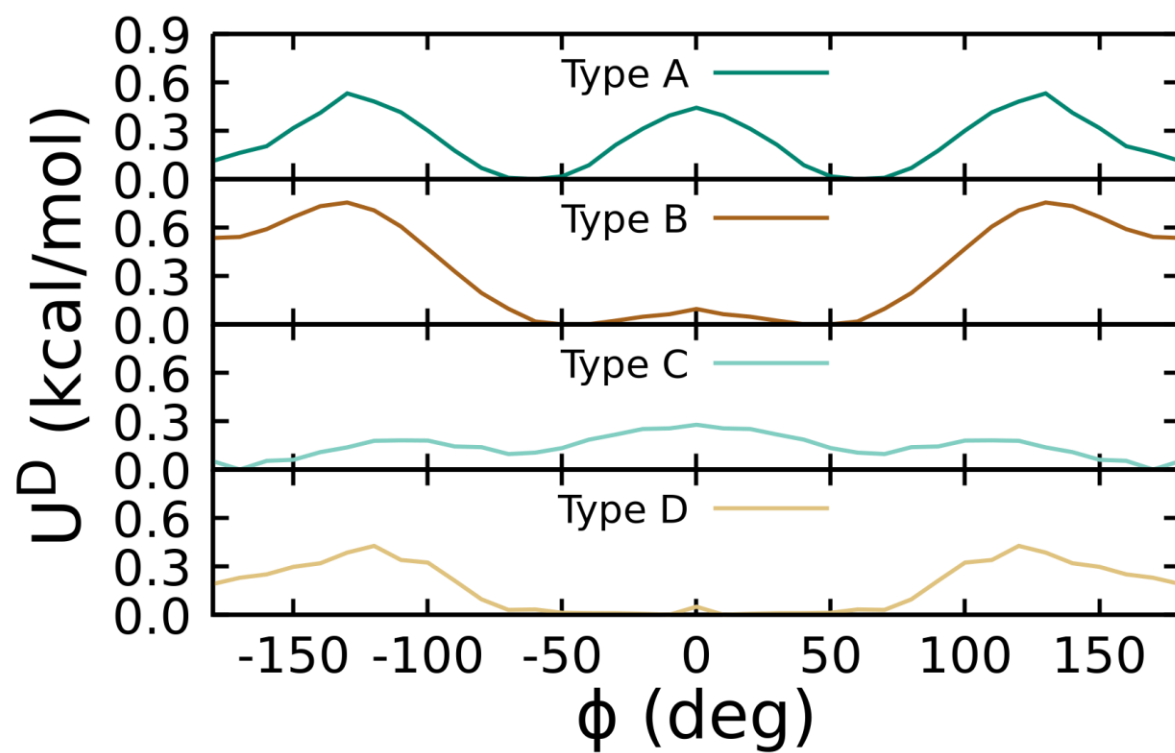

**Figure S3.** Potential energy functions for dihedrals in the coarse grain model. See Table 3 in the main text for type definitions.
